# Supplementary material for: The GTPase Nog1 co-ordinates the assembly, maturation and quality control of distant ribosomal functional centers
Source: eLife journal article supplement (doi:10.7554/elife.52474), 2020-01-07
Supplement: supp [file elife-52474-supp-v1.zip]

Archive with 5 entries (5 files):
- elife_poa_e52474_Transparent_Reporting_File.pdf
- elife_poa_e52474_Figure_2_figure_supplement_1.tif
- elife_poa_e52474_Supplementary_file_2.docx
- elife_poa_e52474_Supplementary_file_1.docx
- elife_poa_e52474_Supplementary_file_3.docx
