# Supplementary figures and images for: The GTPase Nog1 co-ordinates the assembly, maturation and quality control of distant ribosomal functional centers
Source: eLife journal article supplement (doi:10.7554/elife.52474), 2020-01-07

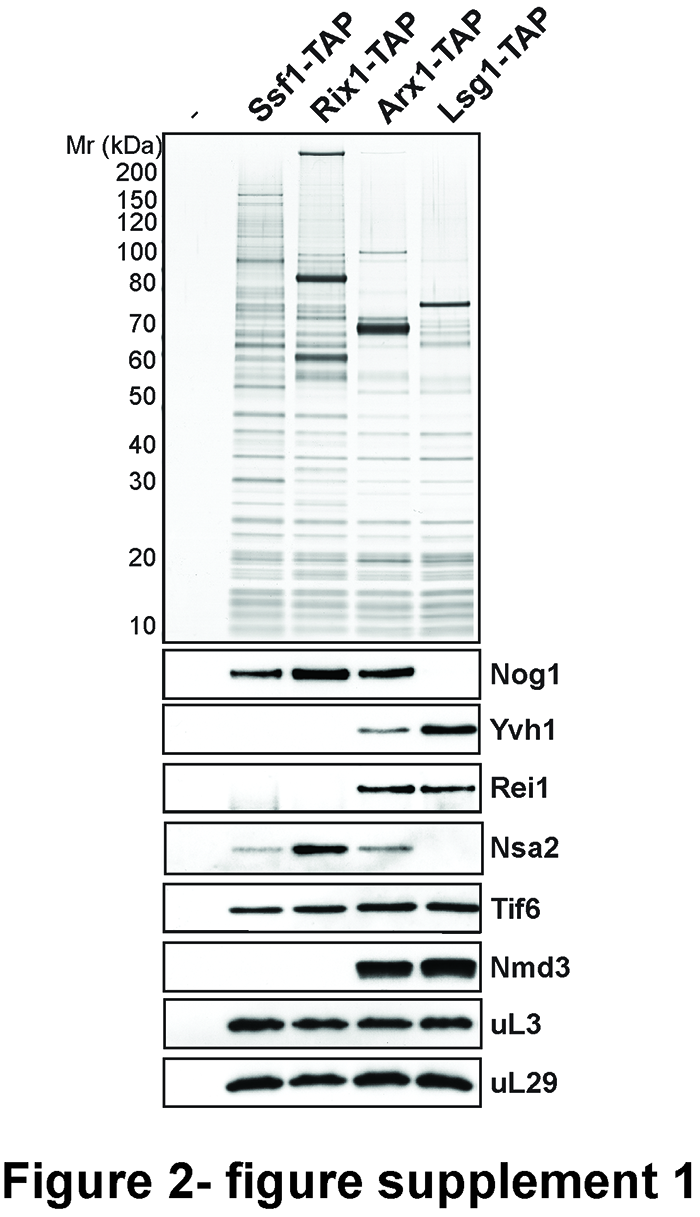

Supplement: supp [file elife-52474-supp-v1.zip › elife_poa_e52474_Figure_2_figure_supplement_1.tif]
